# Supplementary material
Source: MDPI journal article supplement (https://www.mdpi.com/1424-8247/15/10/1212)
Supplement: s1 [file s1]

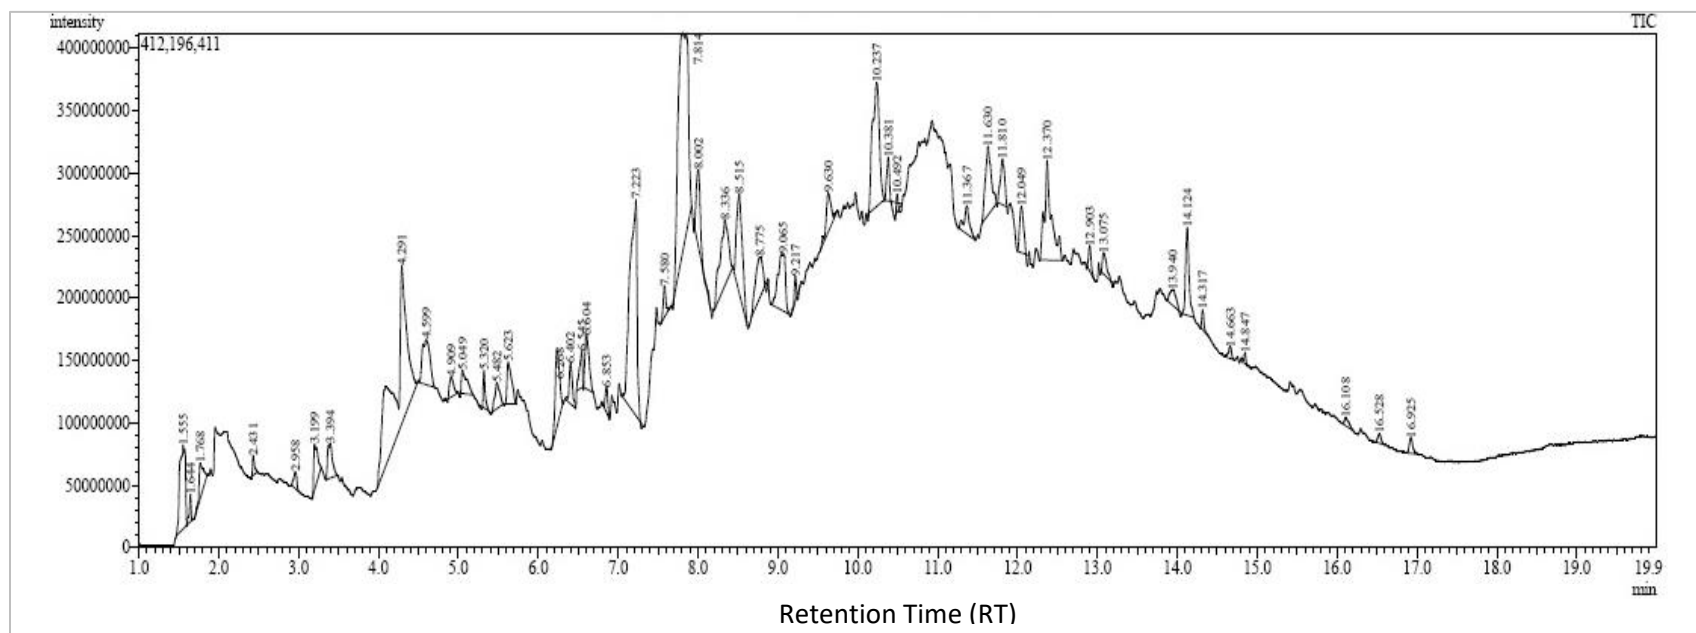

**Figure S1.** Gas chromatography–mass spectrometry (GC-MS) analysis of Sumra honey. Peaks of major compounds were revealed with different percentage of intensity and retention time (RT).
